# Supplementary material for: Acidosis Decreases c-Myc Oncogene Expression in Human Lymphoma Cells: A Role for the Proton-Sensing G Protein-Coupled Receptor TDAG8
Source: MDPI journal article supplement (doi:10.3390/ijms141020236), 2013-10-11
Supplement: s1 [file s1]

Supplementary Information

**Table S1.** Information on the lymphoma tissue cDNA arrays from OriGene technologies.

| **Sku** | **Well** | **Gender** | **Age** | **Tissue** | **Appearance** | **Diagnosis** |
| --- | --- | --- | --- | --- | --- | --- |
| LYRT101/301/501 | 1 | Male | 50 | Lymph node/lymph node | Normal | Granuloma of lymph node |
| LYRT101/301/501 | 2 | Female | 18 | Lymph node/lymph node | Normal | Colitis, ulcerative, chronic active |
| LYRT101/301/501 | 3 | Male | 43 | Lymph node/lymph node | Normal | No evidence of malignancy |
| LYRT101/301/501 | 4 | Male | 52 | Spleen/spleen | Normal | Adenocarcinoma of pancreas, ductal |
| LYRT101/301/501 | 5 | Male | 41 | Spleen/spleen | Normal | No pathologic disease |
| LYRT101/301/501 | 6 | Male | 56 | Spleen/spleen | Normal | Adenocarcinoma of pancreas |
| LYRT101/301/501 | 7 | Male | 58 | Lymphoid tissue/lymph node | Tumor | Lymphoma, anaplastic large cell |
| LYRT101/301/501 | 8 | Male | 37 | Lymphoid tissue/lymph node | Tumor | Lymphoma, follicular |
| LYRT101/301/501 | 9 | Male | 38 | Lymphoid tissue/lymph node | Tumor | Lymphoma, follicular |
| LYRT101/301/501 | 10 | Male | 42 | Lymphoid tissue/lymph node | Tumor | Lymphoma, follicular |
| LYRT101/301/501 | 11 | Not Sp | 67 | Lymphoid tissue/neck | Tumor | Lymphoma, follicular |
| LYRT101/301/501 | 12 | Female | 53 | Lymphoid tissue/salivary gland | Tumor | Lymphoma, follicular |
| LYRT101/301/501 | 13 | Female | 82 | Lymphoid tissue/lymph node | Tumor | Lymphoma, Hodgkin |
| LYRT101/301/501 | 14 | Male | 21 | Lymphoid tissue/lymph node | Tumor | Lymphoma, Hodgkin, nodular lymphocyte predominant |
| LYRT101/301/501 | 15 | Male | 48 | Lymphoid tissue/lymph node | Tumor | Lymphoma, Hodgkin, nodular lymphocyte predominant |
| LYRT101/301/501 | 16 | Female | 65 | Lymphoid tissue/lymph node | Tumor | Lymphoma, Hodgkin, nodular sclerosing |
| LYRT101/301/501 | 17 | Male | 16 | Lymphoid tissue/lymph node | Tumor | Lymphoma, Hodgkin, recurrent |
| LYRT101/301/501 | 18 | Male | 30 | Lymphoid tissue/groin | Tumor | Lymphoma, large B-cell, diffuse |
| LYRT101/301/501 | 19 | Male | 56 | Lymphoid tissue/lymph node | Tumor | Lymphoma, large B-cell, diffuse |
| LYRT101/301/501 | 20 | Female | 57 | Lymphoid tissue/neck | Tumor | Lymphoma, large B-cell, diffuse |
| LYRT101/301/501 | 21 | Female | 77 | Lymphoid tissue/small intestine | Tumor | Lymphoma, large B-cell, diffuse |
| LYRT101/301/501 | 22 | Female | 65 | Lymphoid tissue/thyroid gland | Tumor | Lymphoma, large B-cell, diffuse |
| LYRT101/301/501 | 23 | Male | 76 | Lymphoid tissue/lymph node | Tumor | Lymphoma, nodal marginal zone B-cell |
| LYRT101/301/501 | 24 | Male | 76 | Lymphoid tissue/lymph node | Tumor | Lymphoma, nodal marginal zone B-cell |
| LYRT101/301/501 | 25 | Female | 74 | Lymphoid tissue/lymph node | Tumor | Lymphoma, nodal marginal zone B-cell |
| LYRT101/301/501 | 26 | Male | 51 | Lymphoid tissue/lymph node | Tumor | Lymphoma, peripheral T-cell |

**Table S1.** *Cont.*

| **Sku** | **Well** | **Gender** | **Age** | **Tissue** | **Appearance** | **Diagnosis** |
| --- | --- | --- | --- | --- | --- | --- |
| LYRT101/301/501 | 27 | Male | 71 | Lymphoid tissue/lymph node | Tumor | Lymphoma, peripheral T-cell |
| LYRT101/301/501 | 28 | Female | 72 | Lymphoid tissue/lymph node | Tumor | Lymphoma, small lymphocytic |
| LYRT101/301/501 | 29 | Male | 47 | Lymphoid tissue/lymph node | Tumor | Lymphoma, small lymphocytic |
| LYRT101/301/501 | 30 | Male | 57 | Lymphoid tissue/lymph node | Tumor | Lymphoma, small lymphocytic |
| LYRT101/301/501 | 31 | Female | 76 | Lymphoid tissue/lung | Tumor | Lymphoma, extranodal marginal zone B-cell |
| LYRT101/301/501 | 32 | Male | 29 | Lymphoid tissue/thyroid gland | Tumor | Lymphoma, extranodal marginal zone B-cell |
| LYRT101/301/501 | 33 | Male | 78 | Lymphoid tissue/spleen | Tumor | Lymphoma, follicular |
| LYRT101/301/501 | 34 | Female | 66 | Lymphoid tissue/bone | Tumor | Lymphoma, large B-cell, diffuse |
| LYRT101/301/501 | 35 | Male | 70 | Lymphoid tissue/stomach | Tumor | Lymphoma, large B-cell, diffuse |
| LYRT101/301/501 | 36 | Male | 63 | Lymphoid tissue/Testis | Tumor | Lymphoma, large B-cell, diffuse |
| LYRT101/301/501 | 37 | Male | 45 | Lymphoid tissue/spleen | Tumor | Lymphoma, marginal zone B-cell, splenic |
| LYRT101/301/501 | 38 | Male | 51 | Lymphoid tissue/testis | Tumor | Lymphoma, peripheral T-cell |
| LYRT101/301/501 | 39 | Female | 48 | Lymphoid tissue/omentum | Tumor | Lymphoma, follicular |
| LYRT101/301/501 | 40 | Not Sp | 83 | Lymphoid tissue/ileum | Tumor | Lymphoma, mantle cell |
| LYRT101/301/501 | 41 | Female | 75 | Lymphoid tissue/axillary region | Tumor | Lymphoma, extranodal marginal zone B-cell |
| LYRT101/301/501 | 42 | Female | 74 | Lymphoid tissue/multiple digestive system sites | Tumor | Lymphoma, large B-cell, diffuse |
| LYRT101/301/501 | 43 | Male | 52 | Lymphoid tissue/spleen | Tumor | Lymphoma, mantle cell |
| LYRT101/301/501 | 44 | Male | 55 | Lymphoid tissue/spleen | Tumor | Lymphoma, marginal zone B-cell, splenic |
| LYRT101/301/501 | 45 | Female | 76 | Lymphoid tissue/lung | Tumor | Lymphoma, follicular |
| LYRT101/301/501 | 46 | Female | 58 | Lymphoid tissue/small intestine | Tumor | Lymphoma, follicular |
| LYRT101/301/501 | 47 | Female | 56 | Lymphoid tissue/lymph node: axillary | Tumor | Lymphoma, Hodgkin, nodular sclerosing |
| LYRT101/301/501 | 48 | Male | 55 | Lymphoid tissue/spleen | Tumor | Lymphoma, large B-cell, diffuse |
|  |  |  |  |  |  |  |
| LYRT102/302/502 | 1 | Female | 41 | Lymph node/lymph node | Normal | Adenocarcinoma of lung, bronchioloalveolar |
| LYRT102/302/502 | 2 | Male | 57 | Lymph node/lymph node | Normal | Adenocarcinoma of prostate |
| LYRT102/302/502 | 3 | Female | 74 | Lymph node/lymph node | Normal | Tumor of lung, carcinoid |
| LYRT102/302/502 | 4 | Female | 60 | Spleen/spleen | Normal | Tumor of pancreas, neuroendocrine |
| LYRT102/302/502 | 5 | Male | 66 | Spleen/spleen | Normal | Tumor of pancreas, neuroendocrine |

**Table S1.** *Cont.*

| **Sku** | **Well** | **Gender** | **Age** | **Tissue** | **Appearance** | **Diagnosis** |
| --- | --- | --- | --- | --- | --- | --- |
| LYRT102/302/502 | 6 | Female | 56 | Spleen/spleen | Normal | Normal tissue, post trauma |
| LYRT102/302/502 | 7 | Male | 78 | Lymphoid tissue/lymph node | Tumor | Lymphoma, follicular |
| LYRT102/302/502 | 8 | Male | 71 | Lymphoid tissue/lymph node | Tumor | Lymphoma, follicular |
| LYRT102/302/502 | 9 | Male | 51 | Lymphoid tissue/lymph node | Tumor | Lymphoma, follicular |
| LYRT102/302/502 | 10 | Female | 62 | Lymphoid tissue/lymph node | Tumor | Lymphoma, follicular |
| LYRT102/302/502 | 11 | Female | 58 | Lymphoid tissue/lymph node | Tumor | Lymphoma, follicular |
| LYRT102/302/502 | 12 | Male | 57 | Lymphoid tissue/lymph node | Tumor | Lymphoma, follicular |
| LYRT102/302/502 | 13 | Female | 75 | Lymphoid tissue/lymph node | Tumor | Lymphoma, large B-cell, diffuse |
| LYRT102/302/502 | 14 | Male | 61 | Lymphoid tissue/lymph node | Tumor | Lymphoma, large B-cell, diffuse |
| LYRT102/302/502 | 15 | Male | 65 | Lymphoid tissue/lymph node | Tumor | Lymphoma, large B-cell, diffuse |
| LYRT102/302/502 | 16 | Male | 69 | Lymphoid tissue/groin | Tumor | Lymphoma, large B-cell, diffuse |
| LYRT102/302/502 | 17 | Male | 83 | Lymphoid tissue/lymph node | Tumor | Lymphoma, large B-cell, diffuse |
| LYRT102/302/502 | 18 | Female | 56 | Lymphoid tissue/lymph node | Tumor | Lymphoma, lymphoplasmacytic |
| LYRT102/302/502 | 19 | Male | 66 | Lymphoid tissue/lymphoid tissue | Tumor | Lymphoma, mantle cell |
| LYRT102/302/502 | 20 | Male | 79 | Lymphoid tissue/lymph node | Tumor | Lymphoma, mantle cell, recurrent |
| LYRT102/302/502 | 21 | Male | 38 | Lymphoid tissue/lymph node | Tumor | Lymphoma, nodal marginal zone B-cell |
| LYRT102/302/502 | 22 | Male | 59 | Lymphoid tissue/lymph node | Tumor | Lymphoma, non-Hodgkin B-cell |
| LYRT102/302/502 | 23 | Male | 79 | Lymphoid tissue/lymph node | Tumor | Lymphoma, small lymphocytic |
| LYRT102/302/502 | 24 | Female | 54 | Lymphoid tissue/salivary gland | Tumor | Lymphoma, extranodal marginal zone B-cell |
| LYRT102/302/502 | 25 | Male | 53 | Lymphoid tissue/lung | Tumor | Lymphoma, extranodal marginal zone B-cell |
| LYRT102/302/502 | 26 | Female | 79 | Lymphoid tissue/tonsil | Tumor | Lymphoma, follicular |
| LYRT102/302/502 | 27 | Male | 34 | Lymphoid tissue/spleen | Tumor | Lymphoma, large B-cell, diffuse |
| LYRT102/302/502 | 28 | Male | 58 | Lymphoid tissue/testis | Tumor | Lymphoma, large B-cell, diffuse |
| LYRT102/302/502 | 29 | Male | 84 | Lymphoid tissue/testis | Tumor | Lymphoma, large B-cell, diffuse |
| LYRT102/302/502 | 30 | Male | 76 | Lymphoid tissue/lacrimal gland | Tumor | Lymphoma, mantle cell |
| LYRT102/302/502 | 31 | Female | 57 | Lymphoid tissue/lymph node | Tumor | Lymphoma, follicular |
| LYRT102/302/502 | 32 | Female |  | Lymphoid tissue/lung: left lower lobe | Tumor | Lymphoma, large B-cell, diffuse |
| LYRT102/302/502 | 33 | Male | 75 | Lymphoid tissue/lymph node | Tumor | Mycosis fungoides |

**Table S1.** *Cont.*

| **Sku** | **Well** | **Gender** | **Age** | **Tissue** | **Appearance** | **Diagnosis** |
| --- | --- | --- | --- | --- | --- | --- |
| LYRT102/302/502 | 34 | Male | 52 | Lymphoid tissue/lymph node | Tumor | Lymphoma, small lymphocytic |
| LYRT102/302/502 | 35 | Male | 54 | Lymphoid tissue/mesentery | Tumor | Lymphoma, large B-cell, diffuse |
| LYRT102/302/502 | 37 | Male | 58 | Lymphoid tissue/pancreas | Tumor | Lymphoma, large B-cell, diffuse |
| LYRT102/302/502 | 38 | Female | 60 | Lymphoid tissue/spleen | Tumor | Lymphoma, large B-cell, diffuse |
| LYRT102/302/502 | 39 | Male | 49 | Lymphoid tissue/spleen | Tumor | Lymphoma, large B-cell, diffuse |
| LYRT102/302/502 | 40 | Male | 84 | Lymphoid tissue/small intestine | Tumor | Lymphoma, large B-cell, diffuse |
| LYRT102/302/502 | 41 | Male | 63 | Lymphoid tissue/ileum | Tumor | Lymphoma, lymphoplasmacytic |
| LYRT102/302/502 | 42 | Male | 67 | Lymphoid tissue/colon: transverse | Tumor | Lymphoma, mantle cell |
| LYRT102/302/502 | 43 | Female | 63 | Lymphoid tissue/spleen | Tumor | Lymphoma, marginal zone B-cell, splenic |
| LYRT102/302/502 | 44 | Female | 58 | Lymphoid tissue/lymph node | Tumor | Lymphoma, follicular |
| LYRT102/302/502 | 45 | Male | 61 | Lymphoid tissue/spleen | Tumor | Lymphoma, large B-cell, diffuse |
| LYRT102/302/502 | 46 | Male | 58 | Lymphoid tissue/spleen | Tumor | Lymphoma, large B-cell, diffuse |
| LYRT102/302/502 | 47 | Male | 53 | Lymphoid tissue/spleen | Tumor | Lymphoma, peripheral T-cell |
| LYRT102/302/502 | 48 | Male | 38 | Lymphoid tissue/lymph node | Tumor | Lymphoma, follicular |
